# Supplementary material for: Electrodeposition-based electrochromic devices with reversible three-state optical transformation by using titanium dioxide nanoparticle modified FTO electrode
Source: Royal Society of Chemistry journal article supplement (doi:10.1039/c6ra03315f), 2016-01-01
Supplement: c6ra03315f1.pdf [file c6ra03315f1.pdf]

## Electronic Supporting Information

### Electrodeposition-Based Electrochromic Devices with Reversible Three-States Optical Transformation by Using Titanium Dioxide Nanoparticles Modified FTO Electrode

*Tao Ye, Yong Xiang,\* Hong Ji, Congjin Hu, and Gang Wu\**

School of Energy Science and Engineering, University of Electronic Science and  
Technology of China, 2006 Xiyuan Ave, West High-Tech Zone, Chengdu, Sichuan  
611731, China.

\*E-mail:xiang@uestc.edu.cn.

\*E-mail:wugang2012@uestc.edu.cn.

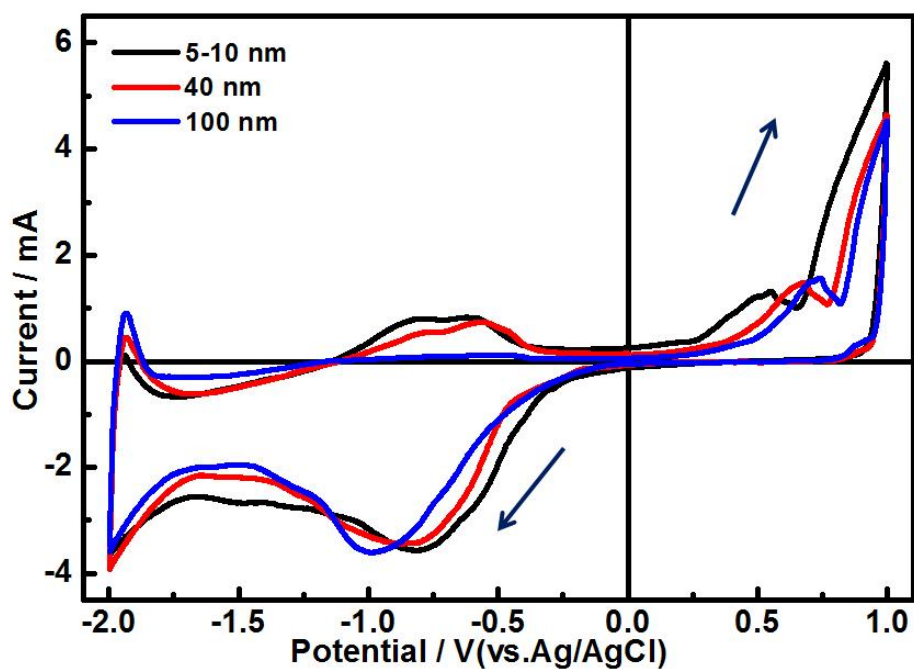

**Figure S1** Cyclic voltammograms of the different sizes TiO<sub>2</sub> nanoparticles (5-10 nm, 40 nm, 100 nm) modified FTO electrodes in DMSO gel electrolyte (100 mM TBABr, 5 mM CuCl<sub>2</sub>, 5 mM AgNO<sub>3</sub>). The CV tests sweep at the rate of 100 mV s<sup>-1</sup>.

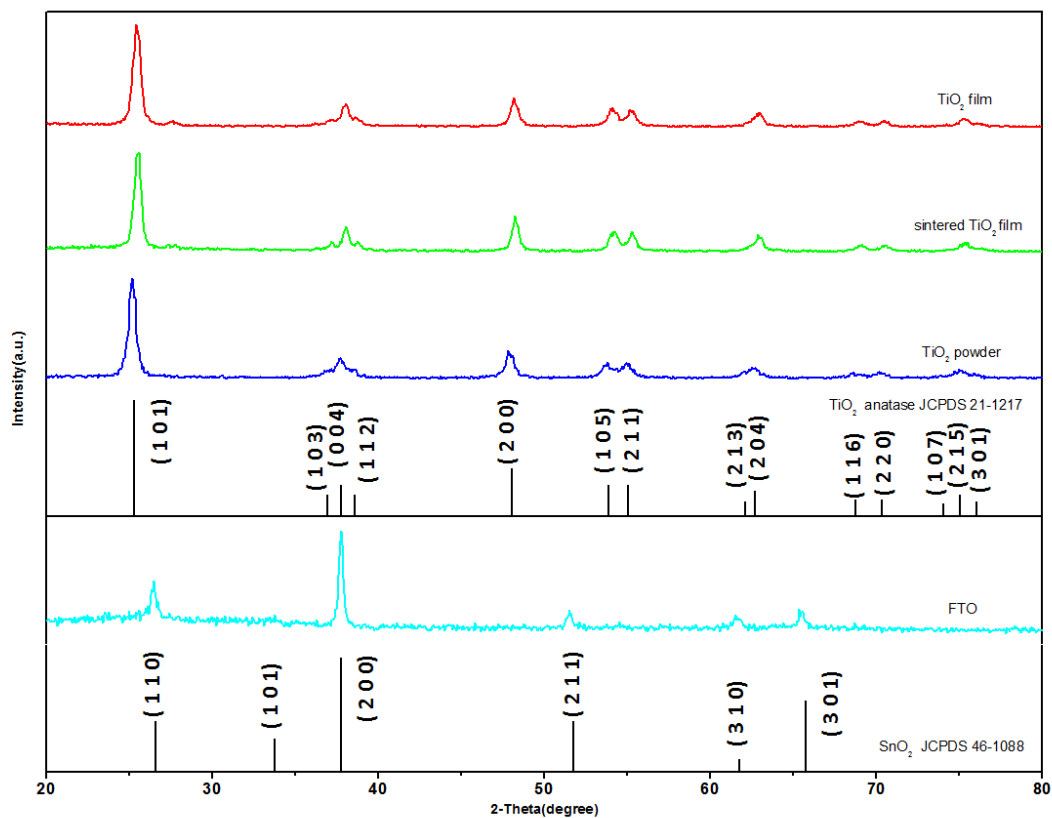

**Figure S2** XRD patterns of TiO<sub>2</sub> film (spin-coated on the FTO and dried), sintered TiO<sub>2</sub> film (spin-coated and sintered at 500 °C for 30 min), fresh TiO<sub>2</sub> nanopowders (purchased and untreated), and flat FTO electrode (cleaned and dried).

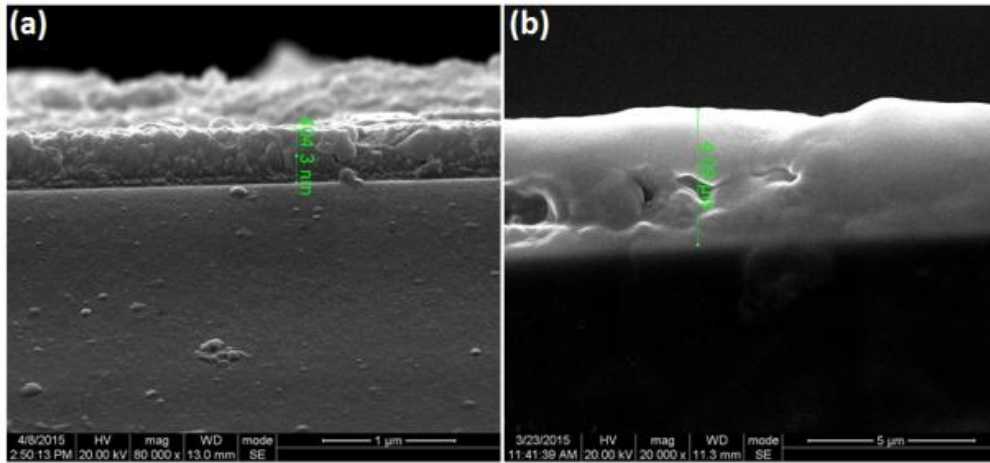

**Figure S3** Side view of FESEM images of the 5-10 nm TiO<sub>2</sub> modified FTO: (a) before Ag deposition, (b) after Ag deposition.

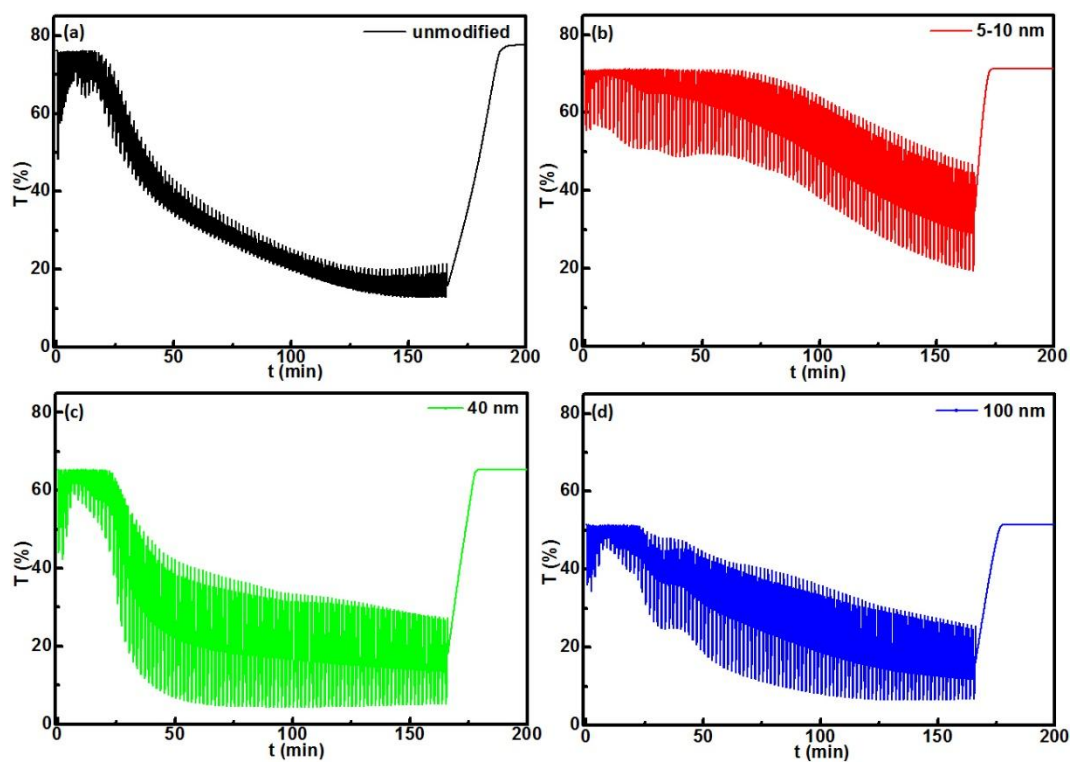

**Figure S4** Transmittance change at 700 nm of the (a) unmodified devices and (b) 5-10 nm, (c) 40 nm, (d) 100 nm TiO<sub>2</sub> particles modified devices during the 100 CV cycles tests in suit. The CV cycle tests sweep at the rate of 100 mV s<sup>-1</sup>.
